# Supplementary material
Source: MDPI journal article supplement (https://www.mdpi.com/2227-9717/9/11/2081)
Supplement: s1 [file s1]

SUPPORTING INFORMATION

Table S1. Comparison between nominal and generated surface tension (with and without correction factors) at different droplet volumes

| Volume (μL) | Input parameters (cm) |        | Surface tension (mN/m) |           |                    |           |
|-------------|-----------------------|--------|------------------------|-----------|--------------------|-----------|
|             | a                     | b      | With correction        | Error (%) | Without correction | Error (%) |
| 1           | 0.0636                | 0.0628 | 72                     | 0         | 77.1               | 7.083     |
| 10          | 0.1388                | 0.1314 | 72.29                  | 0.403     | 80.4               | 11.667    |
| 30          | 0.2087                | 0.1866 | 73.69                  | 2.347     | 82.6               | 14.722    |
| 100         | 0.3280                | 0.2589 | 71.99                  | 0.139     | 81.2               | 12.778    |
| 300         | 0.5135                | 0.3323 | 70.47                  | 2.125     | 80                 | 11.111    |

Table S2. Droplet parameters at different volumes and full range of contact angles: (i) Young-Laplace theoretical droplet; (ii) Generated droplet using elliptic model

| Pre-defined volume ( $\mu\text{L}$ ) | Contact angle ( $^{\circ}$ ) |        |           | Volume ( $\mu\text{L}$ ) |       |           | Surface area ( $\text{cm}^2$ ) |       |           |
|--------------------------------------|------------------------------|--------|-----------|--------------------------|-------|-----------|--------------------------------|-------|-----------|
|                                      | (i)                          | (ii)   | Error (%) | (i)                      | (ii)  | Error (%) | (i)                            | (ii)  | Error (%) |
| 1                                    | 90                           | 90     | 0         | 1.0                      | 1.0   | 0         | 0.039                          | 0.039 | 0         |
|                                      | 105                          | 105.02 | 0.02      | 1.0                      | 1.0   | 0         | 0.039                          | 0.038 | 3.14      |
|                                      | 120                          | 119.53 | 0.39      | 1.0                      | 1.0   | 0         | 0.041                          | 0.041 | 0.25      |
|                                      | 135                          | 134.13 | 0.65      | 1.0                      | 1.0   | 0         | 0.044                          | 0.043 | 0.23      |
|                                      | 150                          | 148.87 | 0.76      | 1.0                      | 1.0   | 0         | 0.046                          | 0.046 | 0.22      |
|                                      | 165                          | 162.96 | 1.25      | 1.0                      | 1.0   | 0         | 0.048                          | 0.048 | 0.41      |
|                                      | 180                          | 174.75 | 3         | 1.0                      | 1.0   | 0         | 0.050                          | 0.049 | 0.41      |
| 10                                   | 90                           | 90     | 0         | 9.9                      | 10.0  | 1.00      | 0.178                          | 0.178 | 0.28      |
|                                      | 105                          | 105.82 | 0.78      | 9.8                      | 9.8   | 0         | 0.178                          | 0.178 | 0.06      |
|                                      | 120                          | 121.53 | 1.26      | 10.0                     | 10.0  | 0         | 0.186                          | 0.185 | 0.22      |
|                                      | 135                          | 137.12 | 1.55      | 10.4                     | 10.4  | 0         | 0.199                          | 0.199 | 0.10      |
|                                      | 150                          | 152.1  | 1.38      | 10.2                     | 10.2  | 0         | 0.206                          | 0.206 | 0.05      |
|                                      | 165                          | 166.36 | 0.82      | 10.0                     | 10.0  | 0         | 0.212                          | 0.212 | 0.00      |
|                                      | 180                          | 179.21 | 0.44      | 10.0                     | 10.0  | 0         | 0.218                          | 0.219 | 0.23      |
| 30                                   | 90                           | 90     | 0         | 30.8                     | 30.8  | 0         | 0.379                          | 0.379 | 0.03      |
|                                      | 105                          | 105.97 | 0.91      | 31.6                     | 31.6  | 0         | 0.386                          | 0.386 | 0.10      |
|                                      | 120                          | 122.16 | 1.77      | 30.1                     | 30.1  | 0         | 0.382                          | 0.383 | 0.10      |
|                                      | 135                          | 138.76 | 2.71      | 31.6                     | 31.7  | 0.32      | 0.410                          | 0.410 | 0.19      |
|                                      | 150                          | 151.25 | 0.83      | 30.2                     | 30.1  | 0.43      | 0.414                          | 0.415 | 0.10      |
|                                      | 165                          | 170.07 | 2.98      | 30.8                     | 30.9  | 0.32      | 0.436                          | 0.438 | 0.43      |
|                                      | 180                          | 180.00 | 0         | 30.9                     | 31.1  | 0.64      | 0.452                          | 0.454 | 0.57      |
| 100                                  | 90                           | 90     | 0         | 100.7                    | 101.0 | 0.30      | 0.846                          | 0.848 | 0.19      |
|                                      | 105                          | 106.05 | 0.99      | 100.2                    | 100.1 | 0.10      | 0.834                          | 0.834 | 0.01      |
|                                      | 120                          | 123.07 | 2.50      | 100.3                    | 100.5 | 0.20      | 0.845                          | 0.843 | 0.27      |
|                                      | 135                          | 141.35 | 4.49      | 101.2                    | 101.5 | 0.30      | 0.871                          | 0.871 | 0.01      |
|                                      | 150                          | 157.83 | 4.96      | 102.0                    | 102.4 | 0.39      | 0.906                          | 0.908 | 0.21      |
|                                      | 165                          | 173.65 | 4.98      | 99.8                     | 100.5 | 0.70      | 0.927                          | 0.933 | 0.69      |
|                                      | 180                          | 180.00 | 0.00      | 100.4                    | 101.3 | 0.89      | 0.963                          | 0.972 | 0.88      |
| 300                                  | 90                           | 90     | 0         | 300.7                    | 294.4 | 2.14      | 1.821                          | 1.801 | 1.10      |
|                                      | 105                          | 106.05 | 0.99      | 302.4                    | 297.8 | 1.54      | 1.780                          | 1.765 | 0.82      |
|                                      | 120                          | 122.30 | 1.88      | 302.0                    | 299.2 | 0.94      | 1.772                          | 1.762 | 0.58      |
|                                      | 135                          | 139.82 | 3.45      | 298.9                    | 297.0 | 0.64      | 1.784                          | 1.772 | 0.67      |
|                                      | 150                          | 157.21 | 4.59      | 300.6                    | 299.2 | 0.47      | 1.835                          | 1.832 | 0.17      |
|                                      | 165                          | 173.65 | 4.98      | 294.2                    | 293.5 | 0.24      | 1.866                          | 1.868 | 0.09      |
|                                      | 180                          | 180.00 | 0         | 300.8                    | 300.0 | 0.27      | 1.959                          | 1.964 | 0.28      |

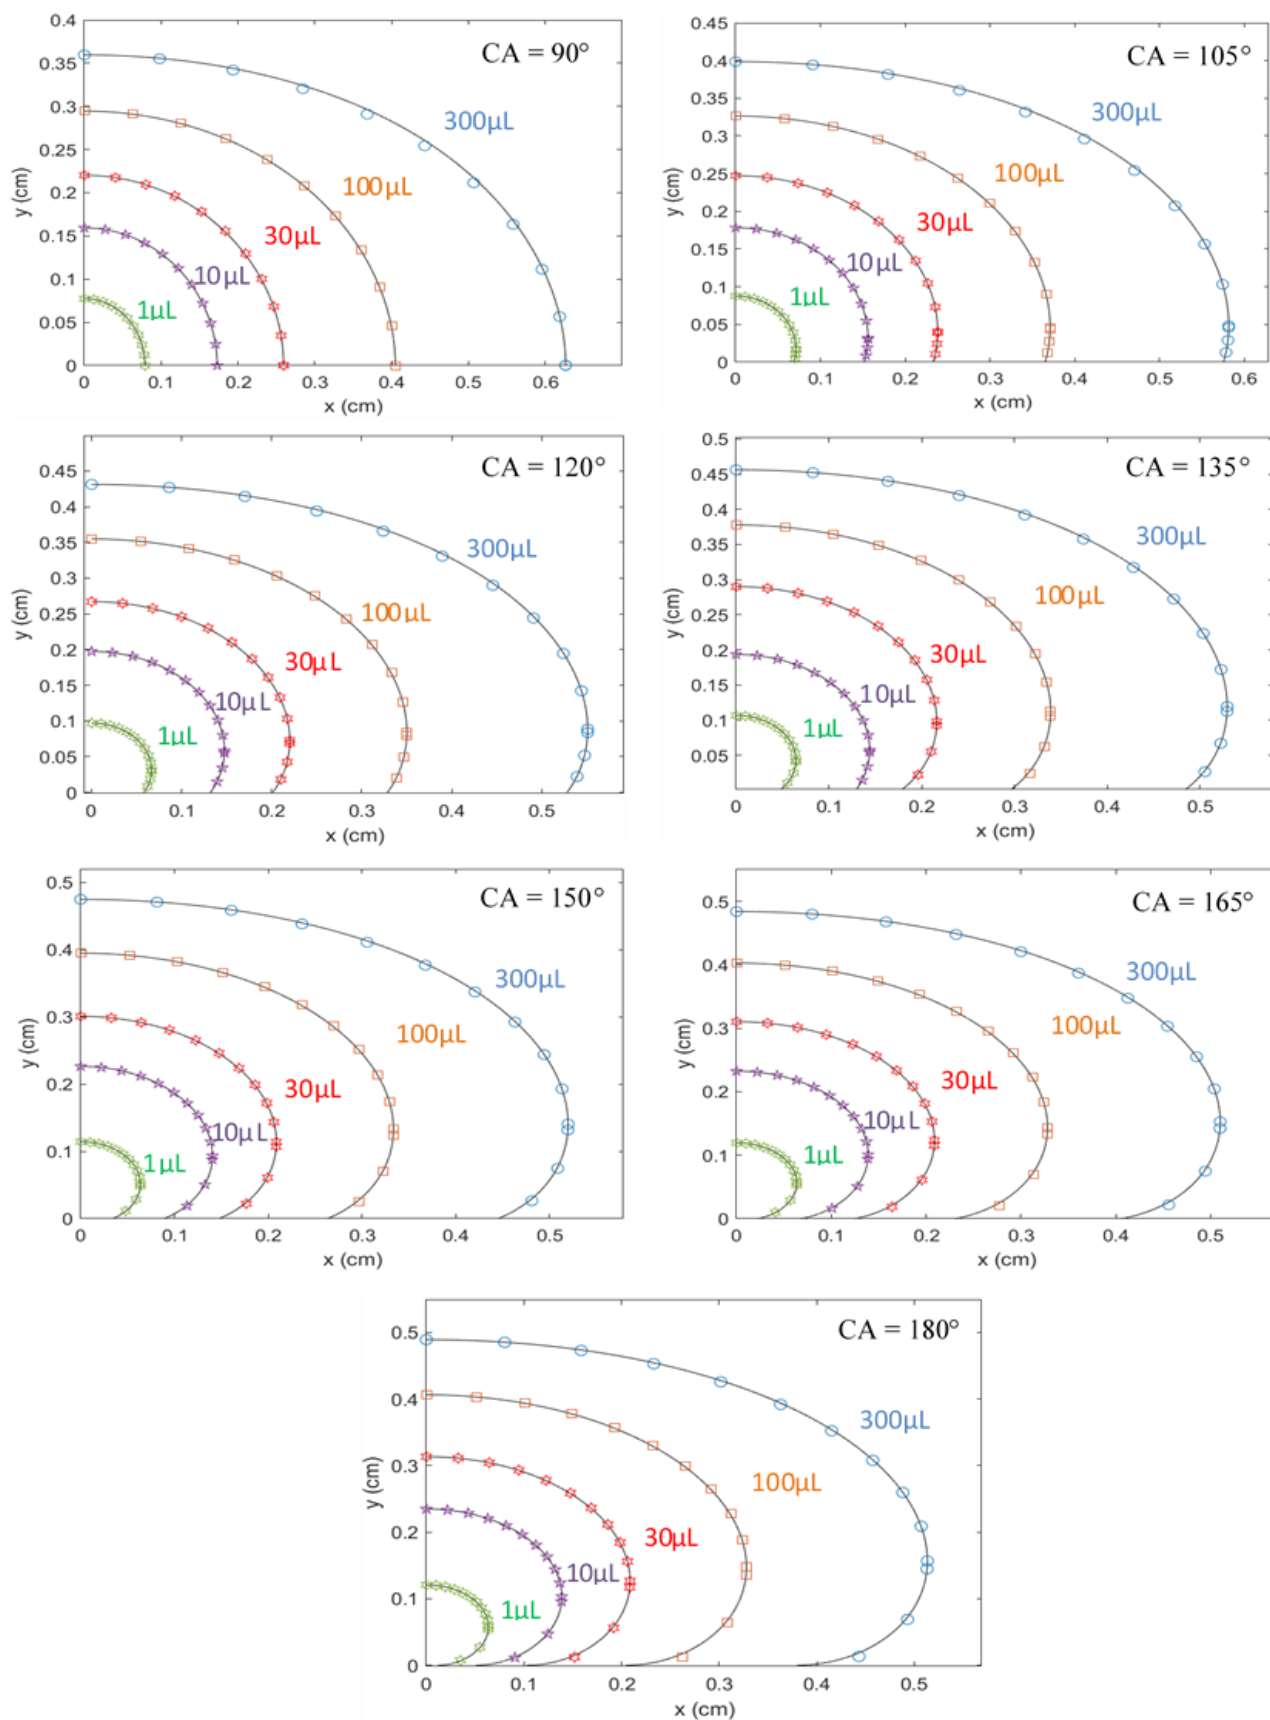

Figure S1. Comparison between droplet profile of Young-Laplace theoretical model (continuous lines) and elliptic model (scattered data points) at different nominal contact angles
